# Supplementary material for: Inside-out core–shell architecture: controllable fabrication of Cu2O@Cu with high activity for the Sonogashira coupling reaction
Source: Royal Society of Chemistry journal article supplement (doi:10.1039/c2cc31577g), 2012-01-01
Supplement: c2cc31577g.pdf [file c2cc31577g.pdf]

## Supporting Information

### Inside-out Core-Shell Architecture: Controllable Fabrication of $\text{Cu}_2\text{O}@Cu$ with High Activity for Sonogashira Coupling Reaction

Jiahui Kou,<sup>\*a</sup> Amit Saha,<sup>a</sup> Christina Bennett-Stamper,<sup>b</sup> and Rajender S. Varma<sup>\*a</sup>

<sup>a</sup> Sustainable Technology Division, National Risk Management Research Laboratory, U.S. Environmental Protection Agency, 26 West Martin Luther King Drive, MS 443, Cincinnati, Ohio 45268, USA, <sup>b</sup> Water Supply Water Resources Division, National Risk Management Research Laboratory, U.S. Environmental Protection Agency, 26 West Martin Luther King Drive, MS 681, Cincinnati, Ohio 45268, USA

Corresponding Author: \*Varma.Rajender@epa.gov

## Experimental Section

The phase purity and crystal structures of as-synthesized samples were detected by an X-ray diffractometer (XRD) (Xpert, Pro, Holland). The morphology was examined by transmission electron microscopy (TEM) (JEOL, JEM-2100, Japan), scanned electron microscopy (SEM) (JEOL, JSM-6490LV, Japan), and field emission scanned electron microscopy (FESEM) (JEOL, JSM-7600F, Japan).

### Synthesis of spherical $\text{Cu}_2\text{O}@Cu$ Core-Shell Structure

In a typical procedure, a solution was first prepared by mixing 0.002 mol  $\text{CuCl}_2$ , 20 mL ethylene glycol, and 10 mL deionized water in a two-necked flask, which was immersed in a water bath at 60 °C. The mixture was stirred with a magnetic stirrer for about 10 min, and then 10 mL 5 mol  $\text{L}^{-1}$  of NaOH was added dropwise. After 5 min, 10 mL 1.1 mol  $\text{L}^{-1}$  of D-glucose (2 g) was added into the solution within 30 s. An orange-red colored precipitate ensued soon. The reaction was kept at 60 °C for 30 min. Afterwards, the solid product was harvested by centrifugation and washed with deionized water 3 times.

### Synthesis of cubic $\text{Cu}_2\text{O}@Cu$ Core-Shell Structure

A solution was first prepared by mixing 0.002 mol  $\text{CuCl}_2$ , 4 mL ethanol, and 56 mL deionized water in a two-necked flask, which was immersed in water bath at 60 °C. The mixture was stirred with a magnetic stirrer for about 5 min, and then 10 mL 2.5 mol  $\text{L}^{-1}$  of NaOH was added in a dropwise manner.

After 5 min, 30 mL 0.18 mol L<sup>-1</sup> of D-glucose (1 g) was added into the solution within 2 min. The reaction was kept at 60 °C for 10 min. Afterwards, cubic Cu<sub>2</sub>O was harvested by centrifugation and washed with deionized water 3 times. All of the Cu<sub>2</sub>O particles were taken in 20 mL ethylene glycol, and 10 mL deionized water in a two-necked flask, which was immersed in water bath at 60 °C. The mixture was stirred with a magnetic stirrer for about 10 min, and then 10 mL 5 mol L<sup>-1</sup> of NaOH was added in dropwise fashion. After 5 min, 10 mL 1.1 mol L<sup>-1</sup> of glucose (2 g) was added into the reaction mixture within 30 s. The reaction was kept at 60 °C for 30 min. Finally, the cubic core-shell Cu<sub>2</sub>O@Cu was harvested by centrifugation and washed with deionized water 3 times.

### **Synthesis of hexapod Cu<sub>2</sub>O@Cu Core-Shell Structure**

A solution was first prepared by mixing 0.001 mol CuCl<sub>2</sub>, 24 mL ethanol, and 6 mL deionized water in a two-necked flask, which was immersed in water bath at 60 °C. The mixture was stirred with a magnetic stirrer for about 5 min, and then 5 mL 10 mol L<sup>-1</sup> of NaOH was added in dropwise manner. After 5 min, 15 mL 0.11 mol L<sup>-1</sup> of D-glucose (0.3 g) was added into the solution within 2 min. The reaction was kept at 60 °C for 30 min. Afterwards, hexapod Cu<sub>2</sub>O was harvested by centrifugation and washed with deionized water 3 times. All of the Cu<sub>2</sub>O particles was added in the 20 mL ethylene glycol, and 10 mL deionized water in a two-necked flask, which was immersed in water bath at 60 °C. The mixture was stirred with a magnetic stirrer for about 10 min, and then 10 mL 5 mol L<sup>-1</sup> of NaOH was added in drop wise manner. After 5 min, 10 mL 1.1 mol L<sup>-1</sup> of glucose (2 g) was dropped into the reaction mixture within 30 s. The reaction was kept at 60 °C for 30 min. Finally, the hexapod core-shell Cu<sub>2</sub>O@Cu was harvested by centrifugation and washed with deionized water 3 times.

### **Palladium- and ligand-free Sonogashira coupling using Cu<sub>2</sub>O@Cu catalyst**

In the experimental procedure for catalytic reaction, a mixture of aryl iodide (1 mmol), phenylacetylene (1 mmol), K<sub>2</sub>CO<sub>3</sub> (2 mmol), and Cu<sub>2</sub>O@Cu (20 mg) in a round-bottomed flask was heated in DMF (2 mL) at 110 °C for the required time period (Table 1). After completion of the reaction (monitored by TLC), the product was extracted into ethyl acetate following the usual work-up procedure and was purified by column chromatography. All of the products listed in Table 1 are known in the literature and were identified by comparison of their FT-IR, <sup>1</sup>H, and <sup>13</sup>C NMR with literature data. All the reagents were purchased from Sigma-Aldrich Chemical Co. and were used directly without further any purification. NMR spectra were obtained using the Bruker AVANCE 300MHz spectrometer using CDCl<sub>3</sub> as solvent. IR spectrum was taken on Perkin Elmer Spectrum 2000 FT-IR spectrometer.

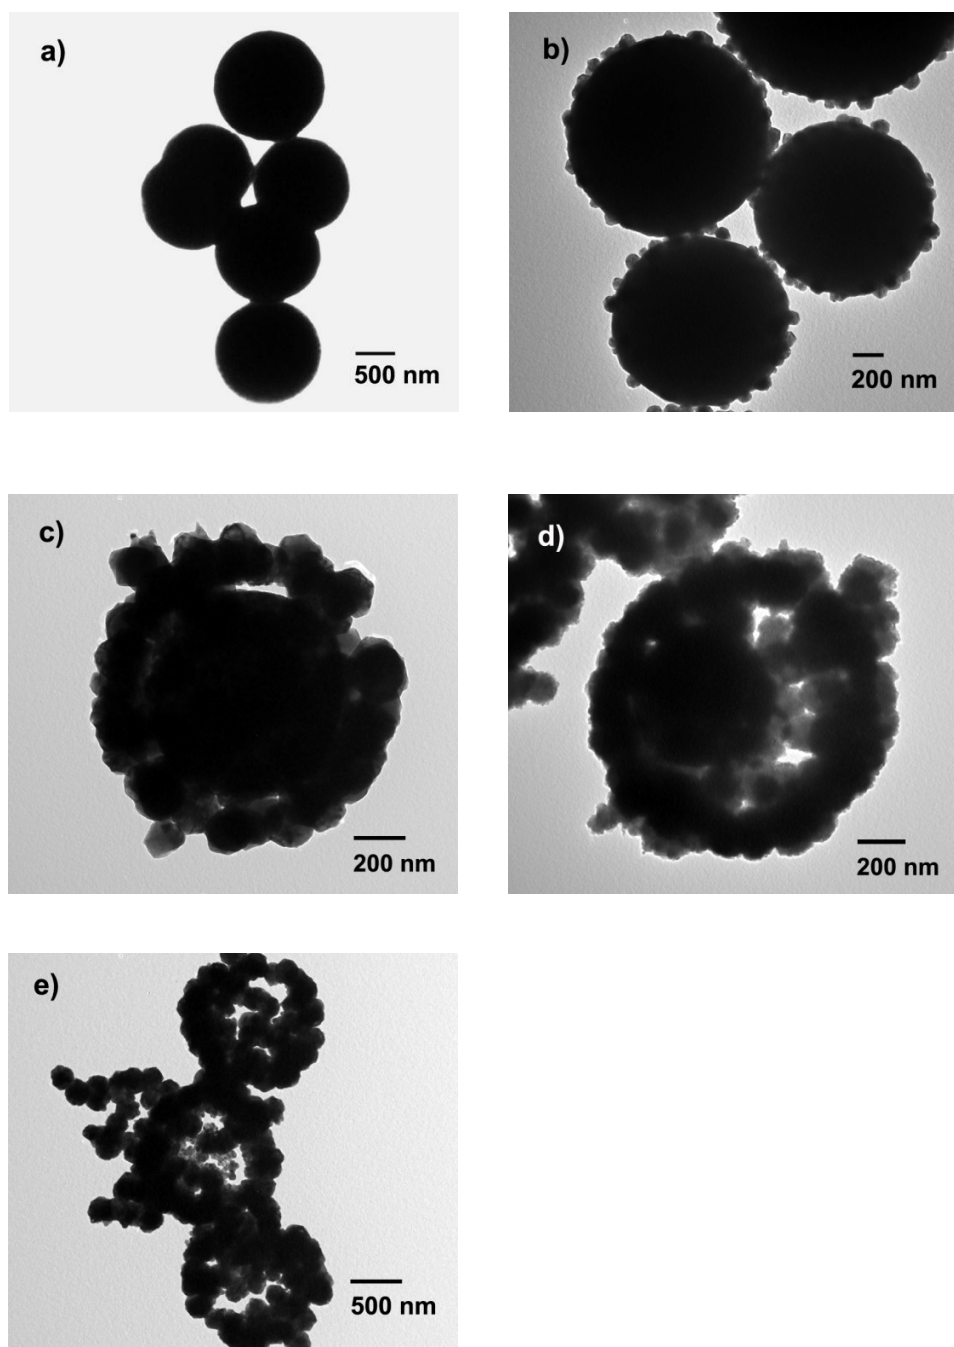

**Fig. S1.** TEM image of samples obtained at different time. a) 2 min; b) 10 min; c) 20 min; d) 30 min; e) 40 min.

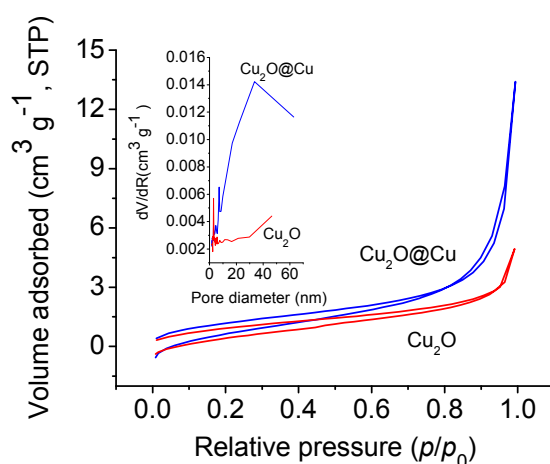

**Fig. S2.** N<sub>2</sub> adsorption–desorption isotherms of Cu<sub>2</sub>O@Cu (prepared at 25 min) and Cu<sub>2</sub>O (prepared at 2 min) and corresponding pore size distributions (inset).

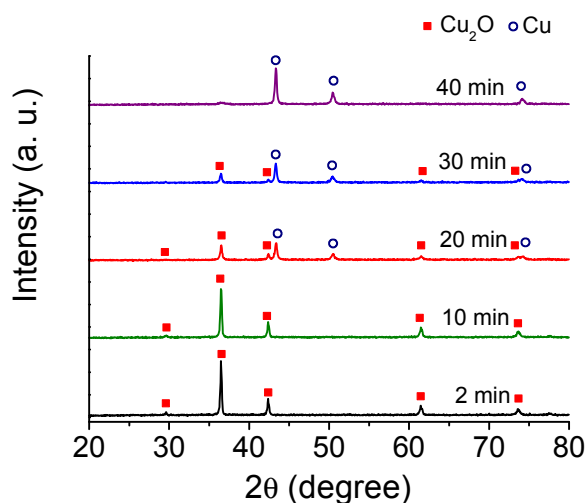

**Fig. S3.** XRD patterns of samples prepared at different time.

According to the Fig. 2b, some small particles are present on the surface of the solid spheres prepared at 10 min, but peaks of Cu are absent. This may be the result of the insufficient crystallinity of Cu or the accuracy limit of the instrument.

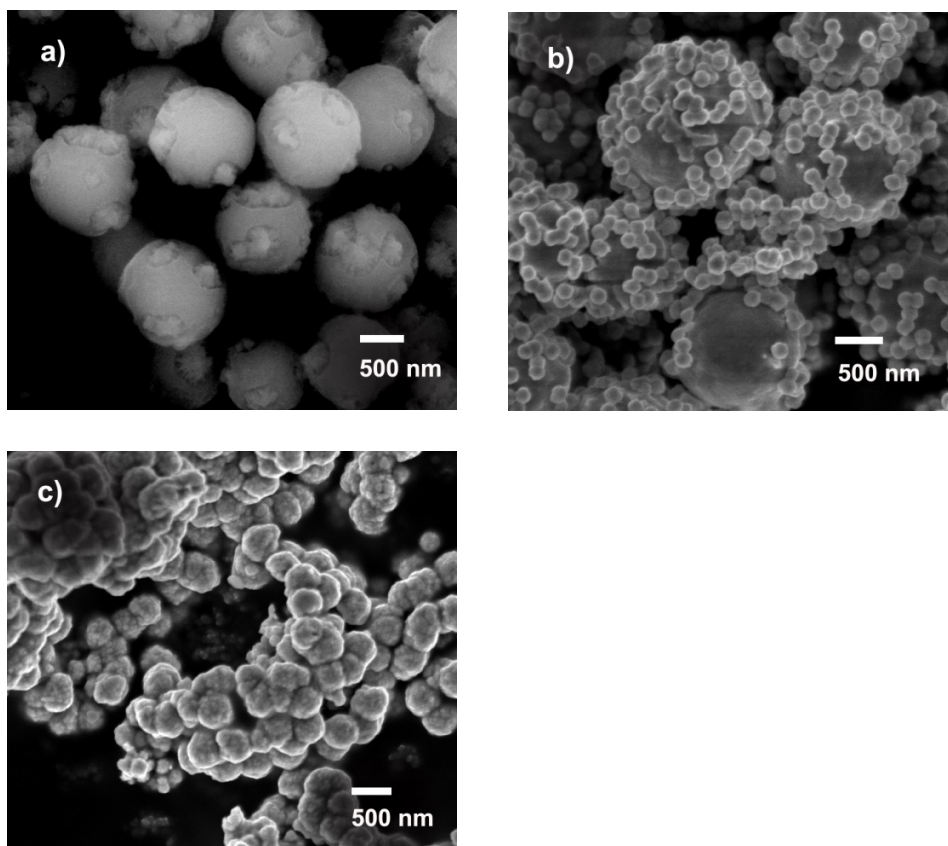

**Fig. S4.** SEM image of samples obtained with different NaOH amount at 30 min. a) 0.8 g; b) 1.5 g; c) 4 g.

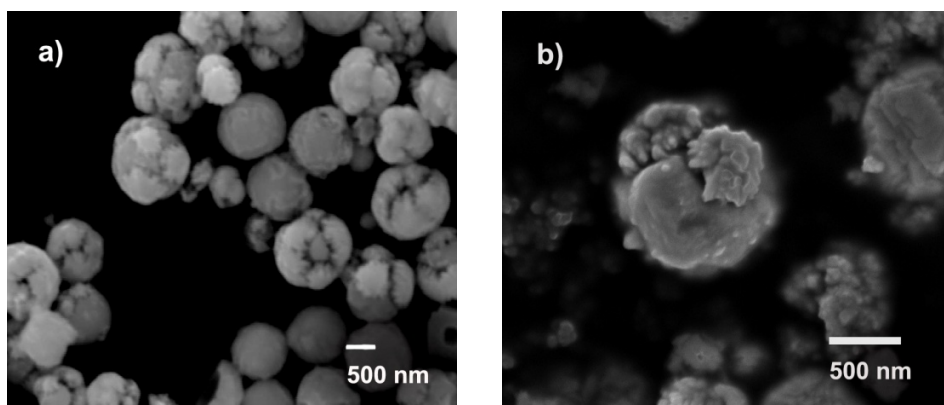

**Fig. S5.** SEM image of samples obtained with 0.8 g NaOH. a) 60 °C, 60 min; b) 80 °C, 30 min.

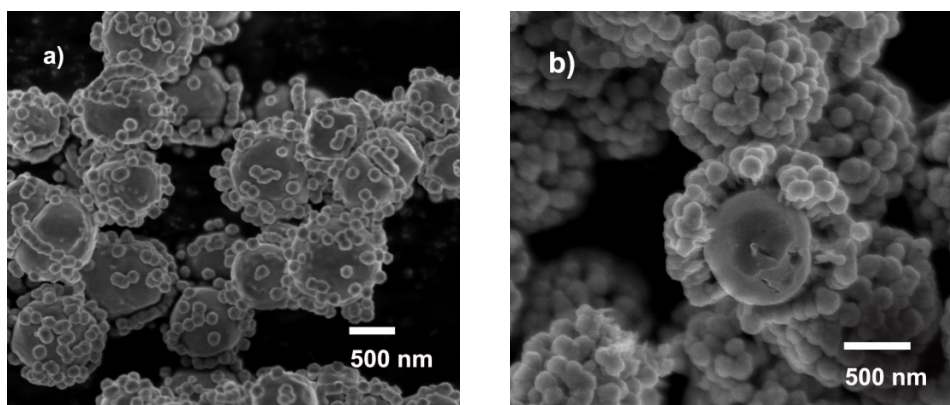

**Fig. S6.** SEM image of samples obtained with different glucose amount at 30 min. a) 1 g; b) 4 g.

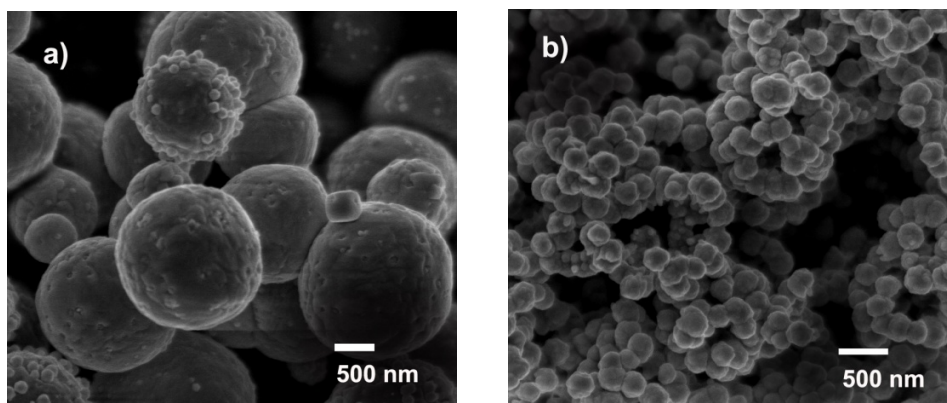

**Fig. S7.** SEM image of samples obtained at different temperature. a) 50 °C; b) 70 °C.



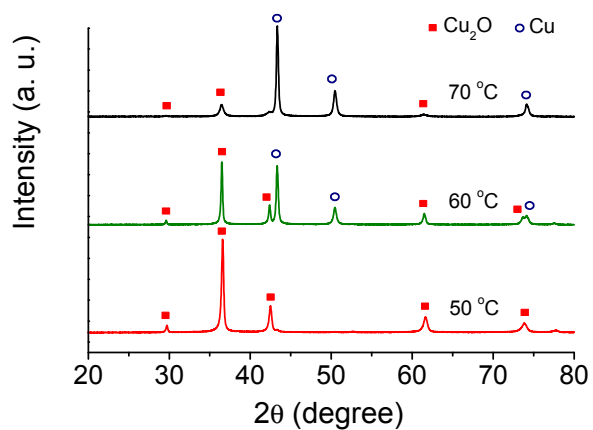

**Fig. S8.** XRD patterns of prepared samples at different temperature (reaction time was 25 min).

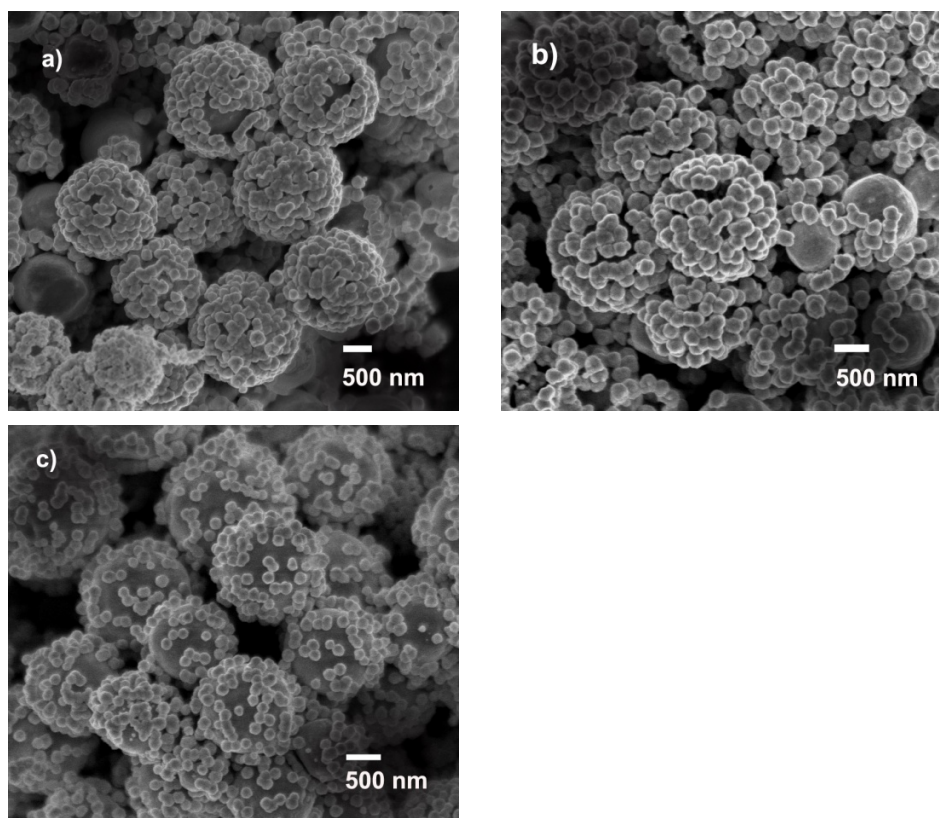

**Fig. S9.** SEM image of samples obtained by using different copper salt. a)  $\text{Cu}(\text{CH}_3\text{COO})_2$ ; b)  $\text{CuSO}_4$ ; (c)  $\text{Cu}(\text{NO}_3)_2$

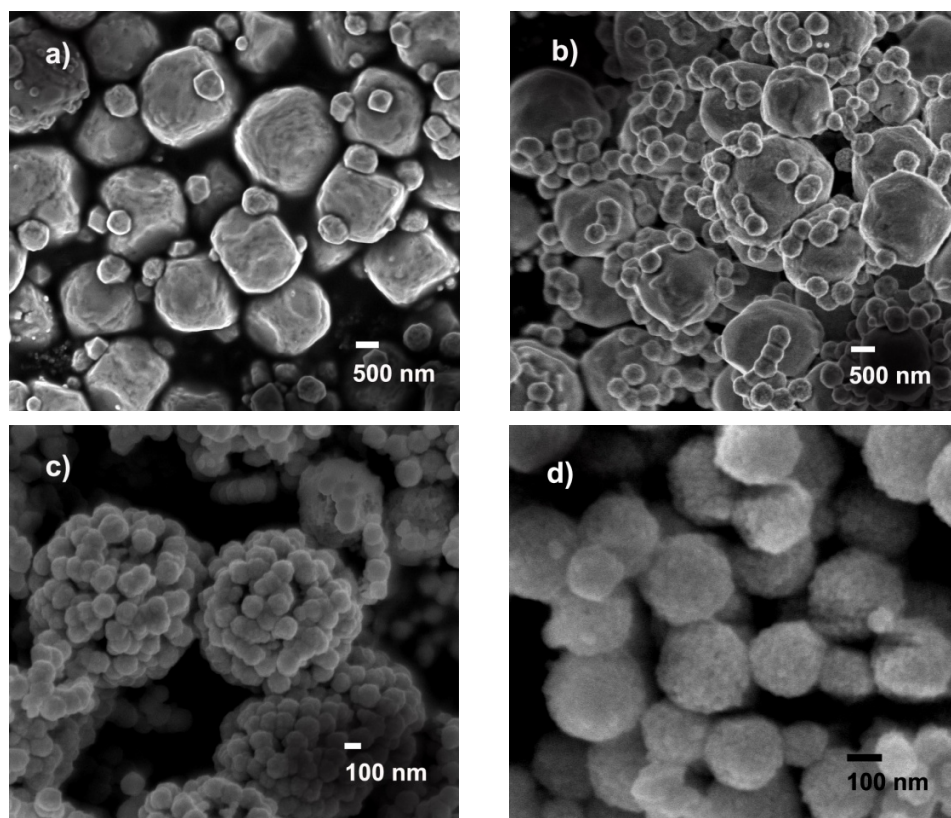

**Fig. S10.** SEM image of samples obtained by using different solvent. a) 50 mL water; b) 10 mL ethylene glycol and 40 mL water; (c) 30 mL ethylene glycol and 20 mL water; d) 50 mL ethylene glycol.

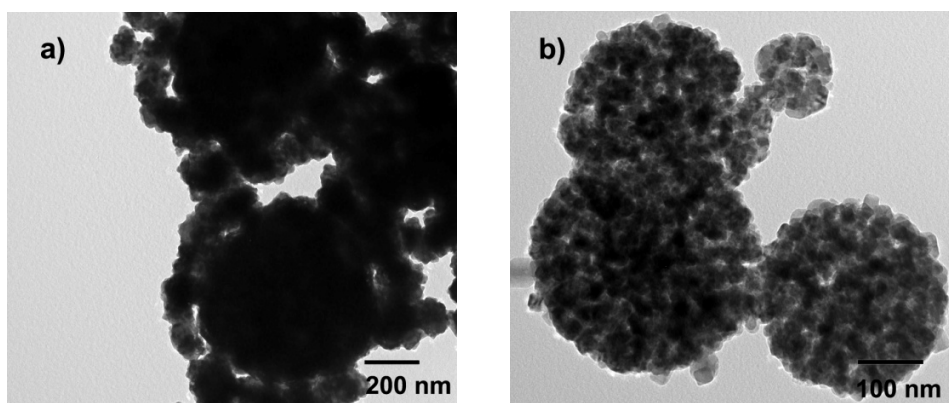

**Fig. S11.** TEM image of samples obtained by using different solvent. a) 30 mL ethylene glycol and 20 mL water; b) 50 mL ethylene glycol.



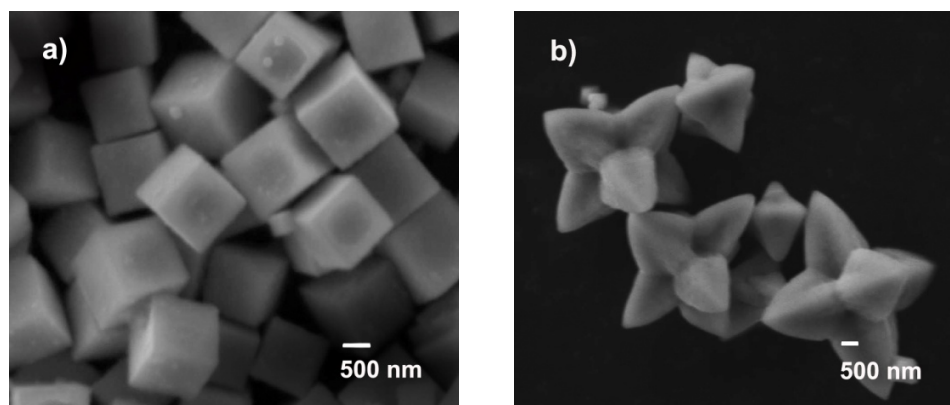

**Fig. S12.** SEM of a) square and b) hexapod structure.

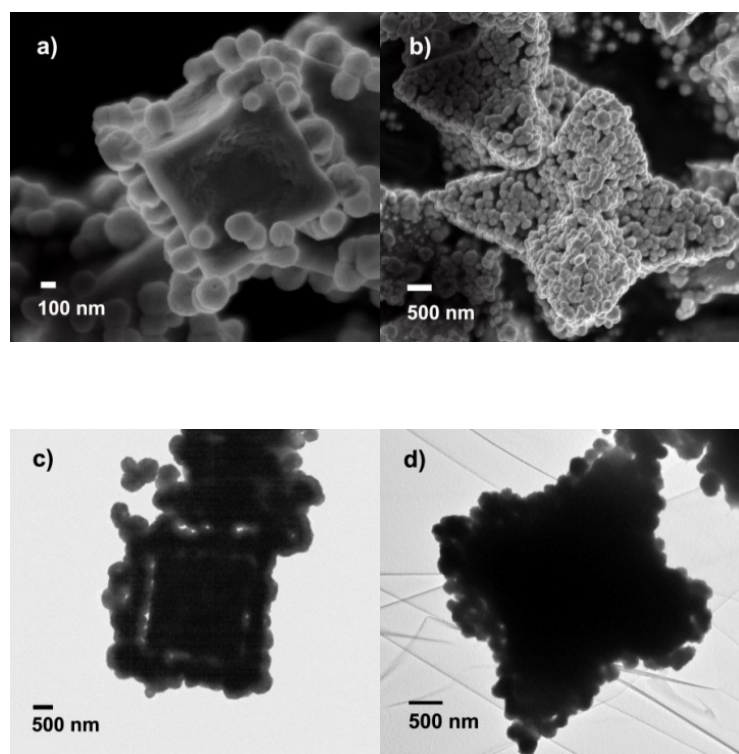

**Fig. S13.** SEM and TEM images of core-shell square and hexapod structures. a) SEM image of square structure; b) SEM image of hexapod structure; c) TEM image of square; d) TEM image of hexapod structure.

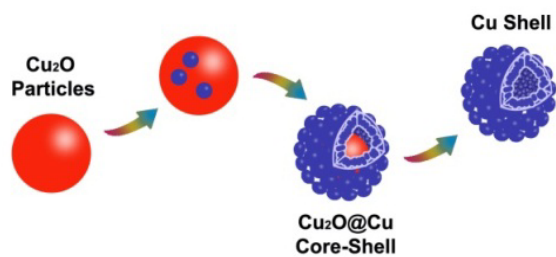

**Scheme S1.** Schematic diagram of the synthetic procedure for the formation of Cu<sub>2</sub>O@Cu core-shell architecture

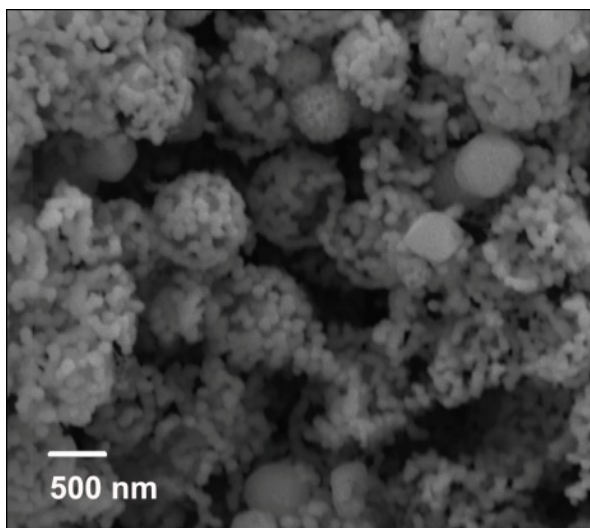

**Fig. S14.** SEM image of recycled sample
